# Supplementary material for: Elaboration, activity and stability of silica-based nitroaromatic sensors
Source: Royal Society of Chemistry journal article supplement (doi:10.1039/c3cp43406k), 2013-01-01
Supplement: c3cp43406k.pdf [file c3cp43406k.pdf]

## Supplementary Information

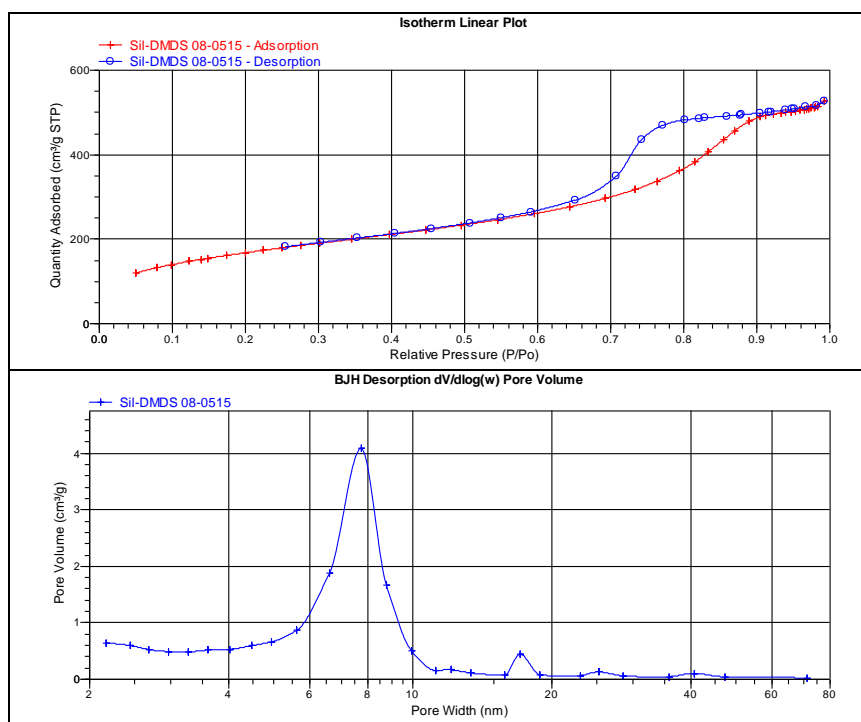

Figure SI : Adsorption/desorption isotherm and, porous distribution (ca 8 nm) of functionalized silica.

Specific area :  $610 \pm 20 \text{ m}^2/\text{g}$

Porous volume :  $0.78 \pm 0.1 \text{ cm}^3/\text{g}$
